# Supplementary material for: Hybrid mass spectrometry approaches in glycoprotein analysis and their usage in scoring biosimilarity
Source: PubMed Central journal article supplement (PMC5105167; doi:10.1038/ncomms13397), 2016-11-08
Supplement: ncomms13397-s1.pdf [file ncomms13397-s1.pdf]

## Supplementary Information

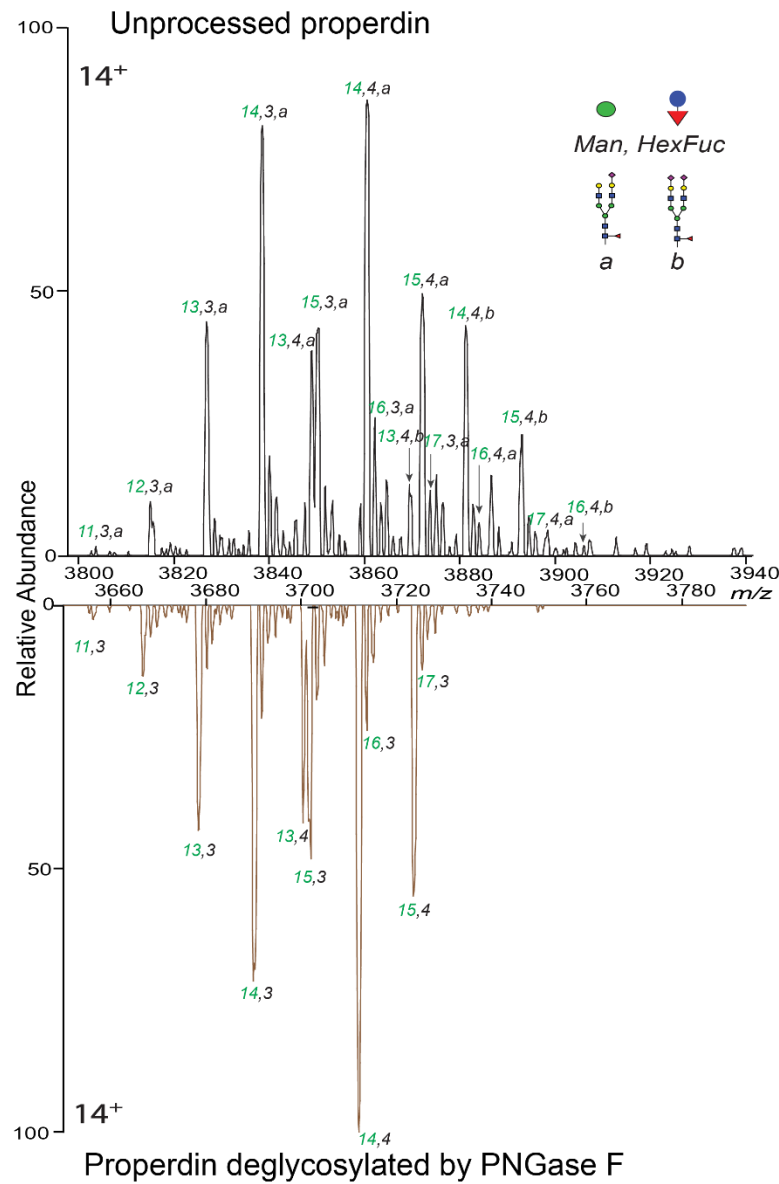

**Supplementary Figure 1.** Native mass spectra of properdin, before and after PNGaseF treatment, zoomed in on the ions of charge state  $[M+14H]^{14+}$ . Notably, the proteoform profile of *N*-deglycosylated properdin remained very similar to the untreated wild-type sample. This shows that the main cause of the heterogeneity on properdin is not *N*-glycosylation.

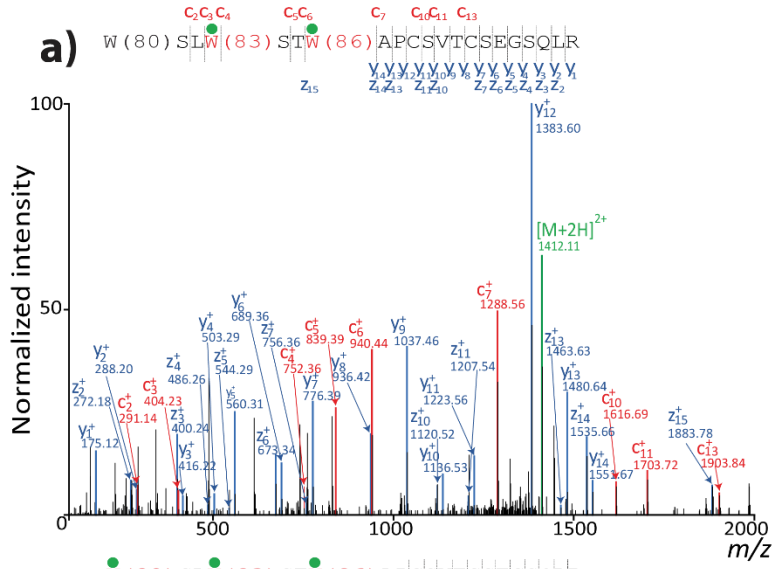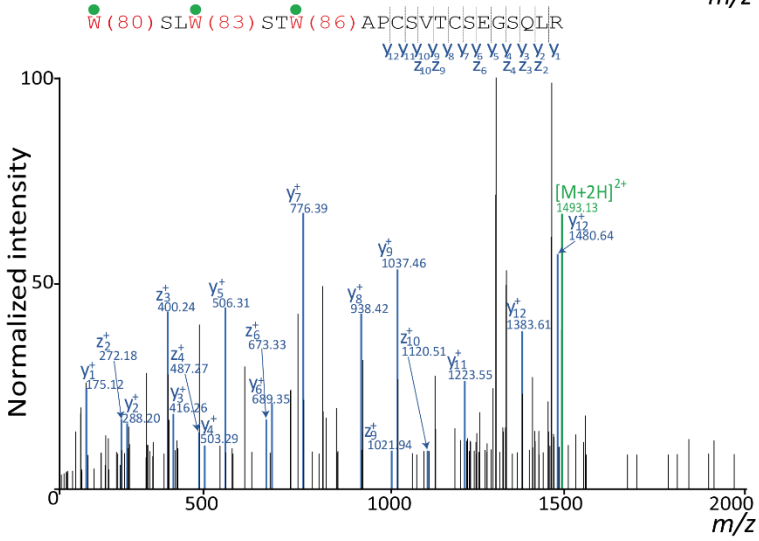

b)

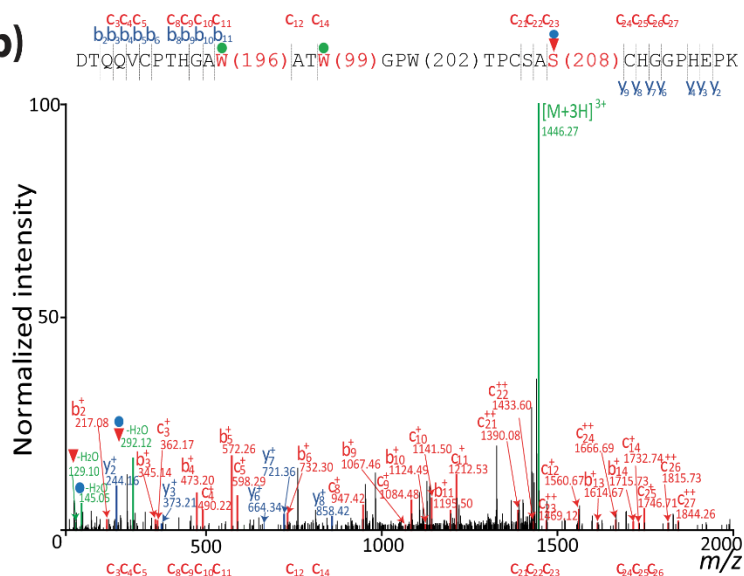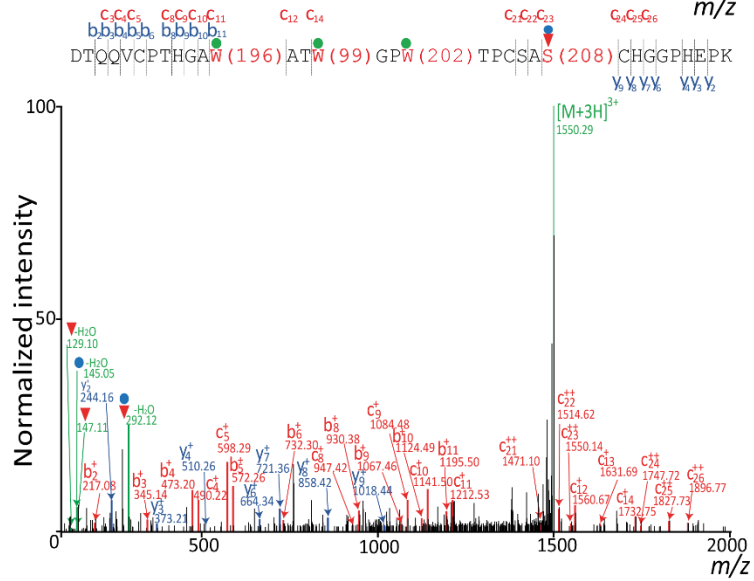

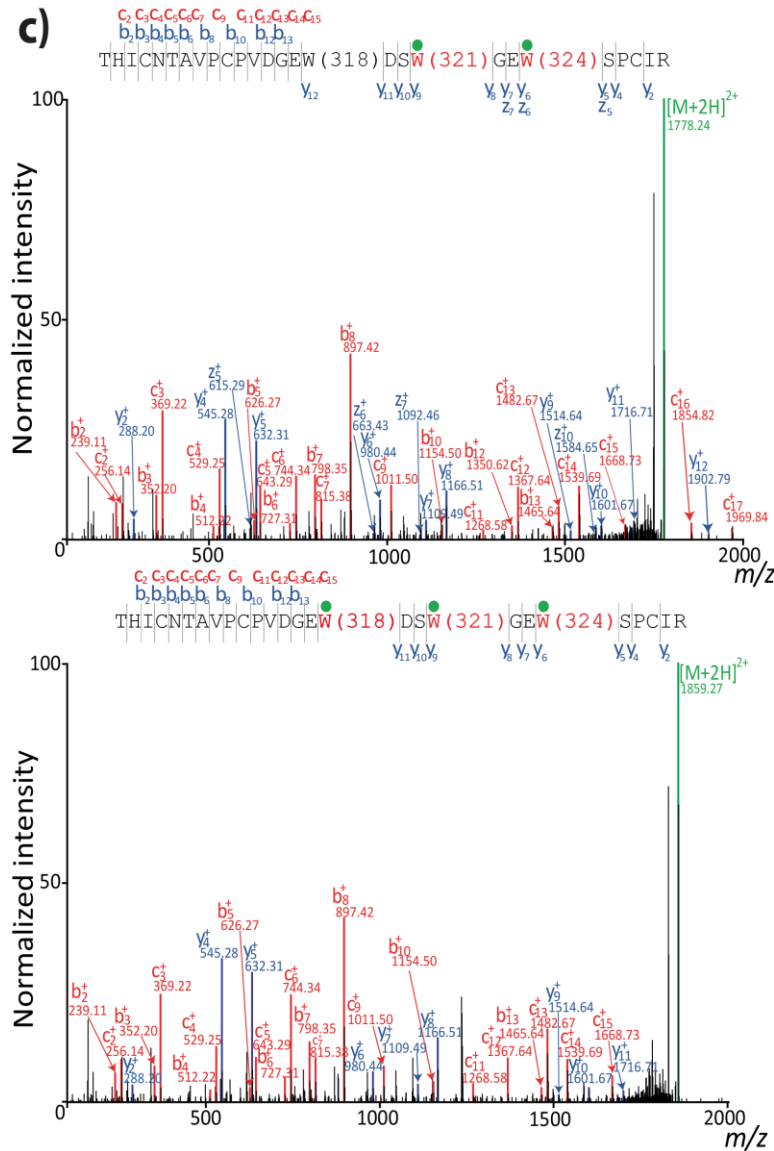

**Supplementary Figure 2.** EThcD MS2 spectra of peptides derived from a proteolytic digestion of properdin. Six selected MS2 spectra are shown, which are acquired for *C*-mannosylated and *O*-glycosylated peptides with precursor *m/z* of 995.43, 941.41 (a), 722.97, 749.98 (b), 929.64 and 889.13 (c). Fragmentation patterns conclusively confirm the identity of the peptides and the composition of PTMs. Three new discovered *C*-mannosylation sites are located at W80, W202 and W318. Since all of these sites are occupied only partially, we also provide MS2 spectra of non-occupied variants. All spectra are interpreted by using the software Byonic and further validated by manual inspection.

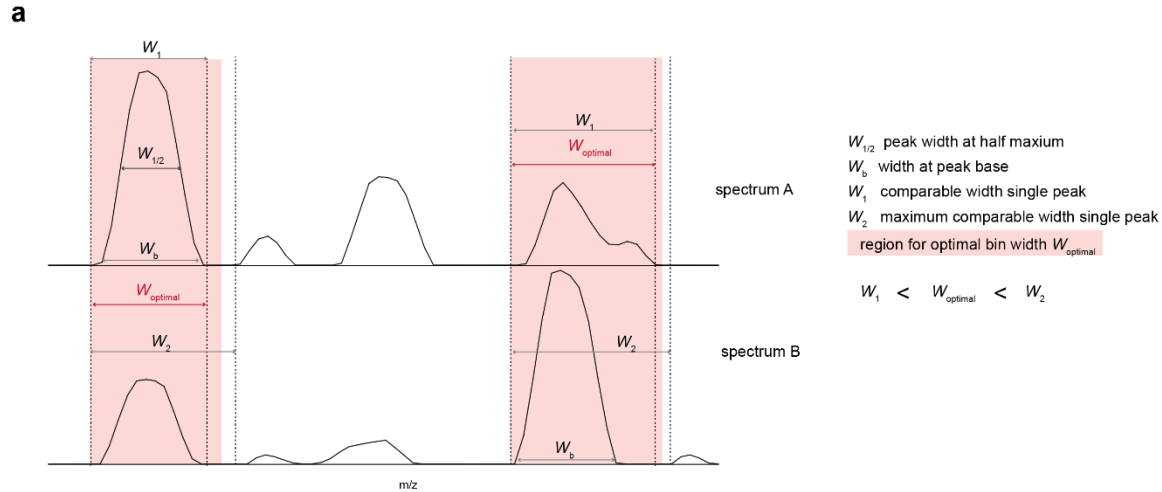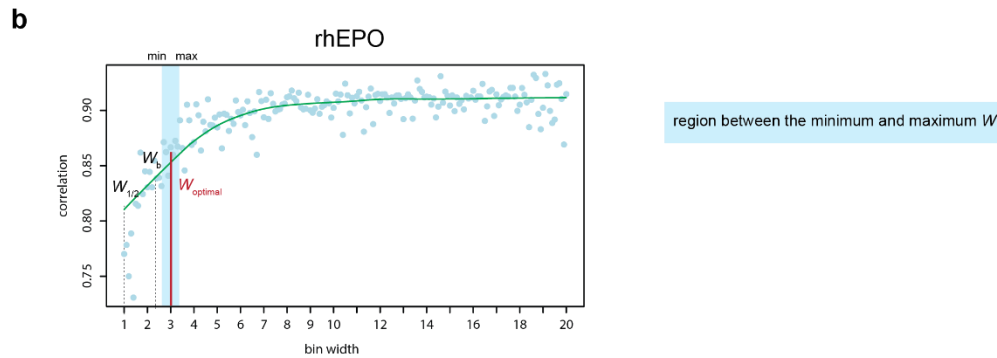

**Supplementary Figure 3.** (a), Illustration of the ideal bin width ( $W_{optimal}$ ) that needs to be chosen close to  $W_1$ , which is the minimum width to include two single peaks to be compared, and no larger than  $W_2$ , which is the maximum width to include two single peaks to be compared. (b) Verification of the selected bin width. Plotted are the correlation values over a series of bin widths (1 to 20  $m/z$  with a step size of 0.1) with a local polynomial regression fitting line shown in green, the chosen bin width is located close to the region of inflection.

**Supplementary Table 1: Quantitative Glycan Profiling of Intact rhEPO by native MS.**

| No. | mass (Da) | relative abundance (%) | HexNAc | Hex | Fuc | Sia | Acetyl | hydroxyl | glycan (Da) | calculated glycan (Da) | dev   |
|-----|-----------|------------------------|--------|-----|-----|-----|--------|----------|-------------|------------------------|-------|
| 1   | 26087.73  | 0.69                   | 17     | 19  | 3   | 3   | 0      | 0        | 7851.74     | 7847.22                | 4.52  |
| 2   | 26123.53  | 0.04                   | 17     | 21  | 1   | 3   | 0      | 1        | 7887.54     | 7895.22                | 7.68  |
| 3   | 26308.28  | 0.13                   | 16     | 18  | 3   | 5   | 0      | 0        | 8072.29     | 8064.40                | 7.89  |
| 4   | 26374.33  | 1.10                   | 17     | 19  | 3   | 4   | 0      | 0        | 8138.34     | 8138.48                | 0.14  |
| 5   | 26412.01  | 0.44                   | 17     | 21  | 1   | 4   | 0      | 1        | 8176.02     | 8186.48                | 10.46 |

|    |          |       |    |    |   |    |   |   |          |          |       |
|----|----------|-------|----|----|---|----|---|---|----------|----------|-------|
| 6  | 26448.76 | 0.26  | 16 | 19 | 3 | 5  | 0 | 0 | 8212.77  | 8226.54  | 13.77 |
| 7  | 26455.77 | 0.15  | 16 | 19 | 1 | 6  | 0 | 0 | 8219.78  | 8225.52  | 5.74  |
| 8  | 26513.08 | 0.57  | 17 | 18 | 3 | 5  | 0 | 0 | 8277.09  | 8267.60  | 9.49  |
| 9  | 26533.19 | 1.21  | 16 | 21 | 3 | 4  | 1 | 0 | 8297.20  | 8301.57  | 4.37  |
| 10 | 26586.85 | 1.79  | 16 | 18 | 3 | 6  | 0 | 0 | 8350.86  | 8355.66  | 4.80  |
| 11 | 26606.60 | 0.17  | 16 | 19 | 2 | 6  | 0 | 0 | 8370.61  | 8371.66  | 1.04  |
| 12 | 26636.95 | 1.86  | 16 | 21 | 2 | 5  | 0 | 0 | 8400.96  | 8404.69  | 3.72  |
| 13 | 26672.76 | 0.01  | 17 | 19 | 3 | 5  | 0 | 0 | 8436.77  | 8429.74  | 7.03  |
| 14 | 26678.96 | 0.11  | 16 | 21 | 2 | 5  | 1 | 0 | 8442.97  | 8446.69  | 3.72  |
| 15 | 26752.57 | 0.03  | 16 | 19 | 3 | 6  | 0 | 0 | 8516.58  | 8517.80  | 1.22  |
| 16 | 26826.92 | 1.24  | 16 | 21 | 3 | 5  | 1 | 0 | 8590.93  | 8592.83  | 1.90  |
| 17 | 26963.99 | 2.21  | 17 | 19 | 3 | 6  | 0 | 0 | 8728.00  | 8721.00  | 7.00  |
| 18 | 27116.10 | 0.39  | 16 | 21 | 3 | 6  | 1 | 0 | 8880.11  | 8884.09  | 3.97  |
| 19 | 27152.78 | 0.20  | 19 | 21 | 3 | 4  | 1 | 0 | 8916.79  | 8911.16  | 5.63  |
| 20 | 27261.66 | 0.99  | 19 | 21 | 2 | 5  | 0 | 1 | 9025.67  | 9030.27  | 4.60  |
| 21 | 27316.45 | 0.11  | 17 | 21 | 3 | 6  | 1 | 0 | 9080.46  | 9087.28  | 6.82  |
| 22 | 27360.58 | 0.21  | 18 | 20 | 3 | 6  | 1 | 0 | 9124.59  | 9128.33  | 3.75  |
| 23 | 27444.93 | 0.13  | 19 | 21 | 3 | 5  | 1 | 0 | 9208.94  | 9202.41  | 6.53  |
| 24 | 27493.48 | 1.52  | 16 | 20 | 3 | 8  | 0 | 0 | 9257.49  | 9262.46  | 4.97  |
| 25 | 27514.72 | 0.02  | 18 | 22 | 2 | 6  | 0 | 1 | 9278.73  | 9280.48  | 1.75  |
| 26 | 27556.12 | 1.81  | 19 | 22 | 3 | 5  | 0 | 0 | 9320.13  | 9322.56  | 2.43  |
| 27 | 27582.50 | 0.00  | 17 | 21 | 3 | 7  | 0 | 0 | 9346.51  | 9336.54  | 9.97  |
| 28 | 27625.99 | 4.17  | 16 | 19 | 3 | 9  | 0 | 0 | 9390.00  | 9391.58  | 1.58  |
| 29 | 27682.61 | 0.31  | 16 | 21 | 3 | 8  | 0 | 1 | 9446.62  | 9440.60  | 6.02  |
| 30 | 27701.15 | 0.45  | 17 | 20 | 3 | 8  | 0 | 0 | 9465.16  | 9465.66  | 0.50  |
| 31 | 27738.07 | 0.07  | 19 | 21 | 3 | 6  | 1 | 0 | 9502.08  | 9493.67  | 8.41  |
| 32 | 27756.80 | 0.21  | 16 | 18 | 3 | 10 | 0 | 0 | 9520.81  | 9520.69  | 0.12  |
| 33 | 27817.47 | 0.02  | 18 | 21 | 3 | 7  | 1 | 0 | 9581.48  | 9581.73  | 0.25  |
| 34 | 27836.13 | 1.60  | 17 | 19 | 3 | 9  | 0 | 0 | 9600.14  | 9594.77  | 5.37  |
| 35 | 27917.35 | 5.67  | 18 | 20 | 3 | 8  | 0 | 1 | 9681.36  | 9684.85  | 3.49  |
| 36 | 27963.29 | 0.61  | 17 | 18 | 3 | 10 | 0 | 0 | 9727.30  | 9723.89  | 3.41  |
| 37 | 27971.65 | 1.78  | 17 | 19 | 2 | 10 | 0 | 0 | 9735.66  | 9739.89  | 4.22  |
| 38 | 27993.07 | 1.66  | 17 | 20 | 3 | 9  | 0 | 0 | 9757.08  | 9756.91  | 0.17  |
| 39 | 28016.90 | 0.52  | 19 | 21 | 3 | 7  | 1 | 0 | 9780.91  | 9784.93  | 4.02  |
| 40 | 28046.66 | 0.76  | 19 | 23 | 3 | 6  | 1 | 0 | 9810.67  | 9817.96  | 7.28  |
| 41 | 28098.37 | 0.02  | 16 | 20 | 3 | 10 | 0 | 1 | 9862.38  | 9860.98  | 1.40  |
| 42 | 28122.01 | 2.18  | 17 | 19 | 3 | 10 | 0 | 0 | 9886.02  | 9886.03  | 0.01  |
| 43 | 28143.34 | 0.55  | 17 | 20 | 2 | 10 | 0 | 0 | 9907.35  | 9902.03  | 5.33  |
| 44 | 28164.58 | 1.22  | 17 | 21 | 3 | 9  | 0 | 1 | 9928.59  | 9935.06  | 6.46  |
| 45 | 28209.51 | 3.90  | 18 | 20 | 3 | 9  | 0 | 1 | 9973.52  | 9976.11  | 2.59  |
| 46 | 28231.77 | 1.13  | 18 | 22 | 3 | 8  | 0 | 0 | 9995.78  | 9993.14  | 2.64  |
| 47 | 28254.38 | 3.12  | 16 | 21 | 3 | 10 | 0 | 1 | 10018.39 | 10023.12 | 4.73  |
| 48 | 28283.21 | 14.21 | 17 | 20 | 3 | 10 | 0 | 0 | 10047.22 | 10048.17 | 0.95  |

---

|    |          |       |    |    |   |    |   |   |          |          |       |
|----|----------|-------|----|----|---|----|---|---|----------|----------|-------|
| 49 | 28303.51 | 0.71  | 17 | 20 | 3 | 10 | 0 | 1 | 10067.52 | 10064.17 | 3.34  |
| 50 | 28325.90 | 3.72  | 17 | 20 | 3 | 10 | 1 | 0 | 10089.91 | 10090.17 | 0.26  |
| 51 | 28337.95 | 0.99  | 19 | 22 | 2 | 8  | 1 | 0 | 10101.96 | 10092.19 | 9.78  |
| 52 | 28367.58 | 0.10  | 17 | 20 | 3 | 10 | 2 | 0 | 10131.59 | 10132.17 | 0.58  |
| 53 | 28379.64 | 0.39  | 15 | 21 | 3 | 11 | 1 | 0 | 10143.65 | 10137.18 | 6.47  |
| 54 | 28410.54 | 1.36  | 17 | 20 | 3 | 10 | 3 | 0 | 10174.55 | 10174.17 | 0.38  |
| 55 | 28449.96 | 1.89  | 17 | 21 | 3 | 10 | 0 | 0 | 10213.97 | 10210.31 | 3.66  |
| 56 | 28484.90 | 1.73  | 18 | 20 | 3 | 10 | 0 | 0 | 10248.91 | 10251.37 | 2.45  |
| 57 | 28517.85 | 1.71  | 18 | 21 | 2 | 10 | 0 | 1 | 10281.86 | 10283.37 | 1.51  |
| 58 | 28544.85 | 0.02  | 15 | 22 | 3 | 11 | 1 | 0 | 10308.86 | 10299.32 | 9.54  |
| 59 | 28575.19 | 34.38 | 17 | 20 | 3 | 11 | 0 | 0 | 10339.20 | 10339.43 | 0.23  |
| 60 | 28595.52 | 4.20  | 17 | 20 | 3 | 11 | 0 | 1 | 10359.53 | 10355.43 | 4.10  |
| 61 | 28616.91 | 13.59 | 17 | 22 | 3 | 10 | 0 | 0 | 10380.92 | 10372.46 | 8.46  |
| 62 | 28648.78 | 7.47  | 18 | 21 | 3 | 10 | 0 | 0 | 10412.79 | 10413.51 | 0.72  |
| 63 | 28660.29 | 2.44  | 18 | 21 | 3 | 10 | 0 | 1 | 10424.30 | 10429.51 | 5.20  |
| 64 | 28702.61 | 4.37  | 18 | 21 | 3 | 10 | 1 | 0 | 10466.62 | 10455.51 | 11.11 |
| 65 | 28723.27 | 0.14  | 19 | 22 | 3 | 9  | 0 | 0 | 10487.28 | 10487.59 | 0.31  |
| 66 | 28742.46 | 3.55  | 17 | 21 | 3 | 11 | 0 | 0 | 10506.47 | 10501.57 | 4.90  |
| 67 | 28778.41 | 4.52  | 18 | 20 | 3 | 11 | 0 | 0 | 10542.42 | 10542.62 | 0.20  |
| 68 | 28811.26 | 1.20  | 18 | 22 | 3 | 10 | 0 | 0 | 10575.27 | 10575.65 | 0.38  |
| 69 | 28823.54 | 1.08  | 16 | 21 | 3 | 12 | 0 | 0 | 10587.55 | 10589.63 | 2.08  |
| 70 | 28866.20 | 21.00 | 17 | 20 | 3 | 12 | 0 | 0 | 10630.21 | 10630.69 | 0.48  |
| 71 | 28886.48 | 2.22  | 19 | 23 | 3 | 9  | 0 | 0 | 10650.49 | 10649.73 | 0.76  |
| 72 | 28908.56 | 10.11 | 17 | 22 | 3 | 11 | 0 | 0 | 10672.57 | 10663.71 | 8.85  |
| 73 | 28940.54 | 45.01 | 18 | 21 | 3 | 11 | 0 | 0 | 10704.55 | 10704.77 | 0.21  |
| 74 | 28960.51 | 2.55  | 18 | 21 | 3 | 11 | 0 | 1 | 10724.52 | 10720.77 | 3.76  |
| 75 | 28982.94 | 14.98 | 18 | 21 | 3 | 11 | 1 | 0 | 10746.95 | 10746.77 | 0.18  |
| 76 | 29015.01 | 2.06  | 19 | 22 | 3 | 10 | 0 | 0 | 10779.02 | 10778.85 | 0.18  |
| 77 | 29025.73 | 5.98  | 17 | 21 | 3 | 12 | 0 | 0 | 10789.74 | 10792.83 | 3.09  |
| 78 | 29067.26 | 6.33  | 18 | 20 | 3 | 12 | 0 | 0 | 10831.27 | 10833.88 | 2.61  |
| 79 | 29087.73 | 0.02  | 18 | 20 | 3 | 12 | 0 | 1 | 10851.74 | 10849.88 | 1.86  |
| 80 | 29109.21 | 3.82  | 18 | 20 | 3 | 12 | 1 | 0 | 10873.22 | 10875.88 | 2.67  |
| 81 | 29137.45 | 0.31  | 19 | 21 | 3 | 11 | 0 | 0 | 10901.46 | 10907.96 | 6.51  |
| 82 | 29153.91 | 0.17  | 17 | 20 | 3 | 13 | 0 | 0 | 10917.92 | 10921.94 | 4.03  |
| 83 | 29168.92 | 0.07  | 19 | 22 | 2 | 11 | 0 | 1 | 10932.93 | 10939.96 | 7.03  |
| 84 | 29189.22 | 0.67  | 19 | 21 | 3 | 11 | 1 | 0 | 10953.23 | 10949.96 | 3.27  |
| 85 | 29231.91 | 65.89 | 18 | 21 | 3 | 12 | 0 | 0 | 10995.92 | 10996.02 | 0.11  |
| 86 | 29251.63 | 8.01  | 18 | 21 | 3 | 12 | 0 | 1 | 11015.64 | 11012.02 | 3.61  |
| 87 | 29273.70 | 24.35 | 18 | 21 | 3 | 12 | 1 | 0 | 11037.71 | 11038.02 | 0.32  |
| 88 | 29304.90 | 35.14 | 19 | 22 | 3 | 11 | 0 | 0 | 11068.91 | 11070.10 | 1.19  |
| 89 | 29347.54 | 7.24  | 19 | 22 | 3 | 11 | 1 | 0 | 11111.55 | 11112.10 | 0.56  |
| 90 | 29357.74 | 3.00  | 18 | 20 | 3 | 13 | 0 | 0 | 11121.75 | 11125.14 | 3.39  |
| 91 | 29388.22 | 4.15  | 18 | 22 | 3 | 12 | 0 | 0 | 11152.23 | 11158.17 | 5.94  |

---

|     |          |        |    |    |   |    |   |   |          |          |       |
|-----|----------|--------|----|----|---|----|---|---|----------|----------|-------|
| 92  | 29400.66 | 3.76   | 18 | 21 | 2 | 13 | 0 | 1 | 11164.67 | 11157.14 | 7.53  |
| 93  | 29432.92 | 3.79   | 19 | 21 | 3 | 12 | 0 | 0 | 11196.93 | 11199.22 | 2.29  |
| 94  | 29440.02 | 2.01   | 19 | 22 | 2 | 12 | 0 | 0 | 11204.03 | 11215.22 | 11.19 |
| 95  | 29460.69 | 0.28   | 19 | 22 | 2 | 12 | 0 | 1 | 11224.70 | 11231.22 | 6.51  |
| 96  | 29474.31 | 1.45   | 20 | 20 | 3 | 12 | 0 | 0 | 11238.32 | 11240.27 | 1.96  |
| 97  | 29523.32 | 36.37  | 18 | 21 | 3 | 13 | 0 | 0 | 11287.33 | 11287.28 | 0.05  |
| 98  | 29543.20 | 4.02   | 18 | 21 | 3 | 13 | 0 | 1 | 11307.21 | 11303.28 | 3.93  |
| 99  | 29565.15 | 13.89  | 19 | 20 | 3 | 13 | 0 | 0 | 11329.16 | 11328.33 | 0.83  |
| 100 | 29596.87 | 71.94  | 19 | 22 | 3 | 12 | 0 | 0 | 11360.88 | 11361.36 | 0.49  |
| 101 | 29617.43 | 4.96   | 19 | 22 | 3 | 12 | 0 | 1 | 11381.44 | 11377.36 | 4.08  |
| 102 | 29639.77 | 27.40  | 19 | 22 | 3 | 12 | 1 | 0 | 11403.78 | 11403.36 | 0.42  |
| 103 | 29671.07 | 15.85  | 20 | 23 | 3 | 11 | 0 | 0 | 11435.08 | 11435.44 | 0.36  |
| 104 | 29683.34 | 5.09   | 18 | 22 | 3 | 13 | 0 | 0 | 11447.35 | 11449.42 | 2.07  |
| 105 | 29724.18 | 6.19   | 19 | 21 | 3 | 13 | 0 | 0 | 11488.19 | 11490.48 | 2.29  |
| 106 | 29743.08 | 0.02   | 19 | 22 | 2 | 13 | 0 | 0 | 11507.09 | 11506.48 | 0.62  |
| 107 | 29753.97 | 0.65   | 19 | 23 | 3 | 12 | 0 | 0 | 11517.98 | 11523.50 | 5.53  |
| 108 | 29764.71 | 6.36   | 20 | 20 | 3 | 13 | 0 | 0 | 11528.72 | 11531.53 | 2.81  |
| 109 | 29798.01 | 0.94   | 20 | 22 | 3 | 12 | 0 | 0 | 11562.02 | 11564.56 | 2.54  |
| 110 | 29808.65 | 2.71   | 18 | 21 | 3 | 14 | 0 | 0 | 11572.66 | 11578.54 | 5.88  |
| 111 | 29847.70 | 1.65   | 18 | 23 | 3 | 13 | 0 | 0 | 11611.71 | 11611.57 | 0.14  |
| 112 | 29888.02 | 100.00 | 19 | 22 | 3 | 13 | 0 | 0 | 11652.03 | 11652.62 | 0.59  |
| 113 | 29908.80 | 10.94  | 19 | 22 | 3 | 13 | 0 | 1 | 11672.81 | 11668.62 | 4.19  |
| 114 | 29930.46 | 37.81  | 20 | 21 | 3 | 13 | 0 | 0 | 11694.47 | 11693.67 | 0.79  |
| 115 | 29962.26 | 39.07  | 20 | 23 | 3 | 12 | 0 | 0 | 11726.27 | 11726.70 | 0.43  |
| 116 | 29970.65 | 6.82   | 19 | 22 | 3 | 13 | 2 | 0 | 11734.66 | 11736.62 | 1.96  |
| 117 | 30004.13 | 8.71   | 20 | 23 | 3 | 12 | 1 | 0 | 11768.14 | 11768.70 | 0.56  |
| 118 | 30014.60 | 5.75   | 19 | 22 | 3 | 13 | 3 | 0 | 11778.61 | 11778.62 | 0.01  |
| 119 | 30036.90 | 13.12  | 19 | 22 | 4 | 13 | 0 | 0 | 11800.91 | 11798.76 | 2.15  |
| 120 | 30054.99 | 10.48  | 19 | 23 | 3 | 13 | 0 | 0 | 11819.00 | 11814.76 | 4.24  |
| 121 | 30079.85 | 1.32   | 19 | 22 | 4 | 13 | 1 | 0 | 11843.86 | 11840.76 | 3.09  |
| 122 | 30083.01 | 1.01   | 21 | 22 | 3 | 12 | 2 | 0 | 11847.02 | 11851.75 | 4.73  |
| 123 | 30097.46 | 4.22   | 19 | 22 | 4 | 13 | 1 | 1 | 11861.47 | 11856.76 | 4.71  |
| 124 | 30122.45 | 1.21   | 19 | 22 | 4 | 13 | 2 | 0 | 11886.46 | 11882.76 | 3.70  |
| 125 | 30129.20 | 0.35   | 20 | 22 | 3 | 13 | 1 | 0 | 11893.21 | 11897.81 | 4.60  |
| 126 | 30139.21 | 4.43   | 19 | 23 | 3 | 13 | 2 | 0 | 11903.22 | 11898.76 | 4.46  |
| 127 | 30179.70 | 55.70  | 19 | 22 | 3 | 14 | 0 | 0 | 11943.71 | 11943.88 | 0.17  |
| 128 | 30199.45 | 5.65   | 19 | 23 | 4 | 13 | 0 | 0 | 11963.46 | 11960.90 | 2.56  |
| 129 | 30221.87 | 21.28  | 19 | 22 | 3 | 14 | 1 | 0 | 11985.88 | 11985.88 | 0.01  |
| 130 | 30254.31 | 60.48  | 20 | 23 | 3 | 13 | 0 | 0 | 12018.32 | 12017.96 | 0.36  |
| 131 | 30271.50 | 3.64   | 20 | 22 | 4 | 13 | 1 | 0 | 12035.51 | 12043.96 | 8.45  |
| 132 | 30296.61 | 22.81  | 20 | 23 | 3 | 13 | 1 | 0 | 12060.62 | 12059.96 | 0.66  |
| 133 | 30327.08 | 13.41  | 19 | 22 | 4 | 14 | 0 | 0 | 12091.09 | 12090.02 | 1.07  |
| 134 | 30346.60 | 6.18   | 20 | 20 | 3 | 15 | 0 | 0 | 12110.61 | 12114.05 | 3.43  |



---

|     |          |       |    |    |   |    |   |   |          |          |       |
|-----|----------|-------|----|----|---|----|---|---|----------|----------|-------|
| 135 | 30370.65 | 7.68  | 20 | 22 | 3 | 14 | 0 | 0 | 12134.66 | 12147.07 | 12.41 |
| 136 | 30376.63 | 1.80  | 20 | 22 | 3 | 14 | 0 | 0 | 12140.64 | 12147.07 | 6.43  |
| 137 | 30401.98 | 4.76  | 20 | 22 | 3 | 14 | 0 | 1 | 12165.99 | 12163.07 | 2.92  |
| 138 | 30421.98 | 4.54  | 20 | 22 | 3 | 14 | 1 | 0 | 12185.99 | 12189.07 | 3.08  |
| 139 | 30453.91 | 1.42  | 21 | 23 | 3 | 13 | 0 | 0 | 12217.92 | 12221.15 | 3.23  |
| 140 | 30463.59 | 0.57  | 20 | 22 | 3 | 14 | 2 | 0 | 12227.60 | 12231.07 | 3.47  |
| 141 | 30470.76 | 1.97  | 19 | 22 | 5 | 14 | 0 | 0 | 12234.77 | 12236.16 | 1.40  |
| 142 | 30495.72 | 1.31  | 21 | 23 | 3 | 13 | 1 | 0 | 12259.73 | 12263.15 | 3.42  |
| 143 | 30510.54 | 0.96  | 19 | 22 | 3 | 15 | 1 | 0 | 12274.55 | 12277.14 | 2.59  |
| 144 | 30544.66 | 40.32 | 20 | 23 | 3 | 14 | 0 | 0 | 12308.67 | 12309.21 | 0.54  |
| 145 | 30564.12 | 3.53  | 20 | 23 | 3 | 14 | 0 | 1 | 12328.13 | 12325.21 | 2.92  |
| 146 | 30587.23 | 13.58 | 21 | 22 | 3 | 14 | 0 | 0 | 12351.24 | 12350.27 | 0.98  |
| 147 | 30619.77 | 48.16 | 21 | 24 | 3 | 13 | 0 | 0 | 12383.78 | 12383.29 | 0.48  |
| 148 | 30638.60 | 1.95  | 20 | 20 | 3 | 16 | 0 | 0 | 12402.61 | 12405.30 | 2.70  |
| 149 | 30662.10 | 16.44 | 22 | 23 | 3 | 13 | 0 | 0 | 12426.11 | 12424.35 | 1.76  |
| 150 | 30693.82 | 20.67 | 20 | 22 | 3 | 15 | 0 | 1 | 12457.83 | 12454.33 | 3.50  |
| 151 | 30702.09 | 2.08  | 20 | 24 | 3 | 14 | 0 | 0 | 12466.10 | 12471.36 | 5.25  |
| 152 | 30712.83 | 3.06  | 20 | 22 | 3 | 15 | 1 | 0 | 12476.84 | 12480.33 | 3.49  |
| 153 | 30735.38 | 3.33  | 21 | 23 | 3 | 14 | 0 | 0 | 12499.39 | 12512.41 | 13.02 |
| 154 | 30746.00 | 1.55  | 21 | 23 | 3 | 14 | 0 | 0 | 12510.01 | 12512.41 | 2.40  |
| 155 | 30768.18 | 1.98  | 21 | 23 | 3 | 14 | 0 | 1 | 12532.19 | 12528.41 | 3.78  |
| 156 | 30787.56 | 4.10  | 21 | 25 | 3 | 13 | 0 | 0 | 12551.57 | 12545.44 | 6.13  |
| 157 | 30824.78 | 0.89  | 22 | 22 | 3 | 14 | 1 | 0 | 12588.79 | 12595.46 | 6.67  |
| 158 | 30837.29 | 1.29  | 20 | 23 | 3 | 15 | 0 | 0 | 12601.30 | 12600.47 | 0.83  |
| 159 | 30859.68 | 0.47  | 23 | 23 | 3 | 13 | 0 | 0 | 12623.69 | 12627.54 | 3.86  |
| 160 | 30872.49 | 1.05  | 21 | 22 | 3 | 15 | 0 | 0 | 12636.50 | 12641.53 | 5.03  |
| 161 | 30910.06 | 30.75 | 21 | 24 | 3 | 14 | 0 | 0 | 12674.07 | 12674.55 | 0.48  |
| 162 | 30916.16 | 0.55  | 21 | 22 | 3 | 15 | 1 | 0 | 12680.17 | 12683.53 | 3.36  |
| 163 | 30929.27 | 1.30  | 19 | 22 | 4 | 16 | 0 | 1 | 12693.28 | 12688.54 | 4.74  |
| 164 | 30952.66 | 12.06 | 22 | 23 | 3 | 14 | 0 | 0 | 12716.67 | 12715.60 | 1.06  |
| 165 | 30985.05 | 34.95 | 20 | 22 | 3 | 16 | 0 | 1 | 12749.06 | 12745.59 | 3.48  |
| 166 | 31027.04 | 13.13 | 23 | 22 | 3 | 14 | 1 | 0 | 12791.05 | 12798.66 | 7.61  |
| 167 | 31059.21 | 8.64  | 24 | 23 | 3 | 13 | 0 | 0 | 12823.22 | 12830.74 | 7.52  |
| 168 | 31064.38 | 2.94  | 19 | 22 | 3 | 17 | 0 | 1 | 12828.39 | 12833.65 | 5.26  |
| 169 | 31078.62 | 2.57  | 21 | 23 | 3 | 15 | 1 | 0 | 12842.63 | 12845.67 | 3.04  |
| 170 | 31111.15 | 2.32  | 22 | 24 | 3 | 14 | 0 | 0 | 12875.16 | 12877.75 | 2.59  |
| 171 | 31132.56 | 1.28  | 22 | 25 | 2 | 14 | 0 | 0 | 12896.57 | 12893.75 | 2.82  |
| 172 | 31151.74 | 1.59  | 23 | 23 | 3 | 14 | 0 | 0 | 12915.75 | 12918.80 | 3.05  |
| 173 | 31193.43 | 0.99  | 23 | 23 | 3 | 14 | 1 | 0 | 12957.44 | 12960.80 | 3.36  |
| 174 | 31224.12 | 0.15  | 24 | 24 | 3 | 13 | 0 | 0 | 12988.13 | 12992.88 | 4.75  |
| 175 | 31243.03 | 0.72  | 22 | 23 | 3 | 15 | 0 | 0 | 13007.04 | 13006.86 | 0.17  |
| 176 | 31275.76 | 23.01 | 22 | 25 | 3 | 14 | 0 | 0 | 13039.77 | 13039.89 | 0.11  |
| 177 | 31295.26 | 0.44  | 23 | 23 | 4 | 14 | 0 | 0 | 13059.27 | 13064.94 | 5.67  |

---

---

|     |          |       |    |    |   |    |   |   |          |          |       |
|-----|----------|-------|----|----|---|----|---|---|----------|----------|-------|
| 178 | 31317.63 | 7.18  | 23 | 24 | 3 | 14 | 0 | 0 | 13081.64 | 13080.94 | 0.70  |
| 179 | 31328.72 | 0.01  | 23 | 25 | 2 | 14 | 0 | 0 | 13092.73 | 13096.94 | 4.21  |
| 180 | 31350.16 | 22.41 | 24 | 23 | 3 | 14 | 0 | 0 | 13114.17 | 13121.99 | 7.83  |
| 181 | 31365.46 | 0.03  | 21 | 23 | 3 | 16 | 1 | 0 | 13129.47 | 13136.93 | 7.46  |
| 182 | 31392.59 | 6.53  | 24 | 25 | 3 | 13 | 0 | 0 | 13156.60 | 13155.02 | 1.58  |
| 183 | 31425.60 | 8.67  | 22 | 25 | 4 | 14 | 0 | 0 | 13189.61 | 13186.03 | 3.57  |
| 184 | 31432.73 | 0.97  | 20 | 23 | 3 | 17 | 0 | 1 | 13196.74 | 13198.99 | 2.25  |
| 185 | 31444.56 | 1.39  | 23 | 23 | 3 | 15 | 0 | 0 | 13208.57 | 13210.06 | 1.49  |
| 186 | 31474.08 | 2.24  | 23 | 25 | 3 | 14 | 0 | 0 | 13238.09 | 13243.08 | 4.99  |
| 187 | 31512.09 | 1.62  | 24 | 24 | 3 | 14 | 0 | 0 | 13276.10 | 13284.14 | 8.04  |
| 188 | 31522.03 | 1.40  | 24 | 24 | 3 | 14 | 0 | 0 | 13286.04 | 13284.14 | 1.90  |
| 189 | 31567.57 | 2.79  | 22 | 25 | 3 | 15 | 0 | 0 | 13331.58 | 13331.15 | 0.43  |
| 190 | 31604.78 | 0.36  | 25 | 23 | 3 | 14 | 1 | 0 | 13368.79 | 13367.19 | 1.60  |
| 191 | 31612.68 | 0.43  | 23 | 22 | 3 | 16 | 1 | 0 | 13376.69 | 13381.17 | 4.48  |
| 192 | 31641.13 | 12.73 | 24 | 23 | 3 | 15 | 0 | 0 | 13405.14 | 13413.25 | 8.11  |
| 193 | 31658.99 | 1.01  | 24 | 24 | 4 | 14 | 0 | 0 | 13423.00 | 13430.28 | 7.28  |
| 194 | 31683.06 | 3.97  | 24 | 25 | 3 | 14 | 0 | 0 | 13447.07 | 13446.28 | 0.79  |
| 195 | 31715.12 | 11.74 | 25 | 24 | 3 | 14 | 0 | 0 | 13479.13 | 13487.33 | 8.20  |
| 196 | 31769.95 | 0.77  | 23 | 25 | 3 | 15 | 0 | 0 | 13533.96 | 13534.34 | 0.39  |
| 197 | 31793.92 | 2.32  | 19 | 22 | 4 | 19 | 0 | 1 | 13557.93 | 13562.31 | 4.38  |
| 198 | 31832.97 | 1.26  | 24 | 25 | 4 | 14 | 0 | 0 | 13596.98 | 13592.42 | 4.56  |
| 199 | 31843.28 | 0.97  | 24 | 26 | 3 | 14 | 0 | 0 | 13607.29 | 13608.42 | 1.13  |
| 200 | 31882.13 | 1.45  | 25 | 25 | 3 | 14 | 0 | 0 | 13646.14 | 13649.47 | 3.34  |
| 201 | 31889.93 | 0.37  | 25 | 26 | 2 | 14 | 0 | 0 | 13653.94 | 13665.47 | 11.53 |
| 202 | 31913.96 | 0.50  | 23 | 22 | 3 | 17 | 1 | 0 | 13677.97 | 13672.43 | 5.54  |
| 203 | 31932.17 | 2.28  | 24 | 23 | 3 | 16 | 0 | 0 | 13696.18 | 13704.51 | 8.34  |
| 204 | 31978.25 | 1.07  | 24 | 25 | 3 | 15 | 0 | 0 | 13742.26 | 13737.54 | 4.72  |
| 205 | 32006.08 | 6.88  | 24 | 27 | 3 | 14 | 0 | 0 | 13770.09 | 13770.56 | 0.48  |
| 206 | 32025.90 | 1.77  | 25 | 25 | 4 | 14 | 0 | 0 | 13789.91 | 13795.62 | 5.71  |
| 207 | 32050.21 | 2.36  | 25 | 26 | 3 | 14 | 0 | 0 | 13814.22 | 13811.62 | 2.60  |
| 208 | 32077.80 | 4.21  | 26 | 25 | 3 | 14 | 0 | 0 | 13841.81 | 13852.67 | 10.86 |
| 209 | 32100.95 | 0.00  | 24 | 24 | 3 | 16 | 0 | 0 | 13864.96 | 13866.65 | 1.69  |
| 210 | 32121.25 | 1.14  | 24 | 26 | 3 | 15 | 0 | 0 | 13885.26 | 13899.68 | 14.42 |
| 211 | 32155.21 | 5.67  | 24 | 27 | 4 | 14 | 0 | 0 | 13919.22 | 13916.71 | 2.51  |
| 212 | 32161.60 | 0.84  | 25 | 25 | 3 | 15 | 0 | 0 | 13925.61 | 13940.73 | 15.13 |
| 213 | 32177.44 | 0.62  | 25 | 25 | 3 | 15 | 0 | 0 | 13941.45 | 13940.73 | 0.72  |
| 214 | 32202.94 | 2.24  | 25 | 26 | 4 | 14 | 0 | 0 | 13966.95 | 13957.76 | 9.19  |
| 215 | 32237.46 | 0.86  | 23 | 24 | 3 | 17 | 1 | 0 | 14001.47 | 13996.72 | 4.75  |
| 216 | 32249.58 | 0.63  | 26 | 26 | 3 | 14 | 0 | 0 | 14013.59 | 14014.81 | 1.22  |
| 217 | 32295.73 | 0.99  | 24 | 27 | 3 | 15 | 0 | 0 | 14059.74 | 14061.82 | 2.08  |
| 218 | 32342.09 | 1.19  | 25 | 26 | 3 | 15 | 0 | 0 | 14106.10 | 14102.87 | 3.22  |
| 219 | 32371.96 | 1.30  | 26 | 25 | 3 | 15 | 0 | 0 | 14135.97 | 14143.93 | 7.96  |
| 220 | 32389.71 | 1.23  | 26 | 26 | 4 | 14 | 0 | 0 | 14153.72 | 14160.96 | 7.24  |

---

|     |          |      |    |    |   |    |   |   |          |          |      |
|-----|----------|------|----|----|---|----|---|---|----------|----------|------|
| 221 | 32408.57 | 0.84 | 26 | 27 | 3 | 14 | 0 | 0 | 14172.58 | 14176.95 | 4.37 |
| 222 | 32445.33 | 2.05 | 27 | 26 | 3 | 14 | 0 | 0 | 14209.34 | 14218.01 | 8.66 |
| 223 | 32478.36 | 5.05 | 25 | 23 | 3 | 17 | 1 | 0 | 14242.37 | 14240.96 | 1.41 |
| 224 | 32487.21 | 0.01 | 25 | 26 | 4 | 15 | 0 | 0 | 14251.22 | 14249.02 | 2.20 |
| 225 | 32500.62 | 0.88 | 25 | 27 | 3 | 15 | 0 | 0 | 14264.63 | 14265.02 | 0.39 |
| 226 | 32524.99 | 2.25 | 24 | 23 | 3 | 18 | 0 | 0 | 14289.00 | 14287.03 | 1.97 |
| 227 | 32558.87 | 5.23 | 26 | 27 | 4 | 14 | 0 | 0 | 14322.88 | 14323.10 | 0.22 |
| 228 | 32606.88 | 1.23 | 27 | 27 | 3 | 14 | 0 | 0 | 14370.89 | 14380.15 | 9.26 |
| 229 | 32654.10 | 0.53 | 28 | 26 | 3 | 14 | 0 | 0 | 14418.11 | 14421.20 | 3.09 |
| 230 | 32701.41 | 0.53 | 26 | 27 | 3 | 15 | 0 | 0 | 14465.42 | 14468.21 | 2.79 |
| 231 | 32735.13 | 0.47 | 25 | 23 | 3 | 18 | 0 | 0 | 14499.14 | 14490.22 | 8.92 |
| 232 | 32745.19 | 0.38 | 26 | 27 | 3 | 15 | 1 | 0 | 14509.20 | 14510.21 | 1.01 |
| 233 | 32780.05 | 0.13 | 27 | 26 | 3 | 15 | 1 | 0 | 14544.06 | 14551.26 | 7.21 |
| 234 | 32805.93 | 1.53 | 28 | 26 | 4 | 14 | 0 | 0 | 14569.94 | 14567.35 | 2.59 |
| 235 | 32809.73 | 0.40 | 28 | 27 | 3 | 14 | 0 | 0 | 14573.74 | 14583.34 | 9.60 |
| 236 | 32853.87 | 0.02 | 29 | 26 | 3 | 14 | 0 | 0 | 14617.88 | 14624.40 | 6.52 |

### Supplementary Note 1: Heterogeneity of properdin

Properdin belongs to the protein superfamily which contains a functional protein module thrombospondin repeat (TSR). These proteins seem to be a major group of acceptor substrates for *C*-mannosylation, however the function of this unusual modification remains unclear. Interestingly, properdin TSR1, 2, 3 and 4 has been found also *O*-fucosylated in the C-X-X(S/T)C-X motif adjacent to the *C*-mannosylation sites (1). *O*-fucosylation plays some role in the folding and secretion of TSR superfamily proteins (e.g., ADAMTS-13 and ADAMTS-like 1) (2), but the functional relationship between *O*-fucosylation and *C*-mannosylation in the same TSR is unknown. For that reason, our specified information about structural details of properdin could be helpful to understand more to this peculiar structures as TSRs are. Figure 6c shows all identified peptide proteoforms of properdin together with their estimated relative abundances. Five of six TSRs presented in the monomer of properdin contain a complex recognition motif for *C*-mannosylation W-X-X-W-X-X-W, only TSR4 contains a sequence motif W-X-X-W-X-X-X, without W or other aromatic residue at position 3+ relative to the second W. Additionally to *C*-mannosylation and *O*-glycosylation sites, there is also one *N*-glycosylation site at TSR6. More detail look on the graph (c) in Figure 6 shows a certain variability of *C*-mannosylation occupancy in different TSRs. In all TSR structures of properdin the second W in the complex recognition motif W-X-X-W-X-X-W is found always *C*-mannosylated while the first and the third are modified partially with different level of occupancy. The highest level of heterogeneity

can be observed in TSR1. The first W (W80) is modified in less than 0.5% cases. On the other hand, the third W (W86) is occupied for more than 93%. Lower occupancy of the first W (W318) can be also observed in the TSR5 (approx. 9%) while the third W (W324) is fully modified. TSR2 and TSR6 show a different C-mannosylation pattern. In most of the cases all three W sites are occupied by mannose, 80% in TSR2 and 97% in TSR6. In contrast with TSR1 and TSR5, the first W in TSR2 and TSR6 (W139 and W382) are modified 100%. The third W in both of these TSRs is not modified in 20% (W145) and 3% (W366) respectively. Similarly to TSR2 and TSR6, TSR3 also contains mannose on the first W (W196) in 100%. However, the third W (W202) is in majority non-modified (69%). The last properdin structure module TSR4 contains two fully occupied C-mannosylation sites, W260 and W263. The third W in the sequence motif W-X-X-W-X-X-W is untypically replaced by an amino acid valine. Regarding O-glycosylation site-occupancy, TSR1 shows partial O-glycosylation (Glc-Fuc) on T92 (55%). O-glycosylation sites T151, S208 and T272 in TSR2, 3 and 4 are exclusively modified by Glc-Fuc. The full picture of proteoform heterogeneity is completed by the information about the existence of N-glycosylation on C-termini of properdin. N428 is modified by two types of glycan, both of which is a complex biantennary N-glycan with a fucosylated core and sialylated antennas.

### Supplementary References

- 1) Gonzalez de Peredo, A., Klein, D., Macek, B., Hess, D., Peter-Katalinic, J. & Hofsteenge, J. C-mannosylation and O-fucosylation of thrombospondin type 1 repeats *Mol. Cell Proteomics* **1**, 11–18 (2002).
- 2) Wang, L. W., Dlugosz, M., Somerville, R. P. T., Read, M., Haltiwanger, R. S. & Apte, S. S. O-fucosylation of thrombospondin type 1 repeats in ADAMTS-like-1/Punctin-1 regulates secretion: implications for the ADAMTS superfamily *J. Biol. Chem.* **282**, 17024-17031 (2007).
